# Supplementary material
Source: Springer Nature journal article supplement (https://www.springermedizin.de/resource/supplementary/13014_2012_750_MOESM9_ESM.pdf/9634002)

**A** miR-21 expression in IDC breast cancer (86 cases)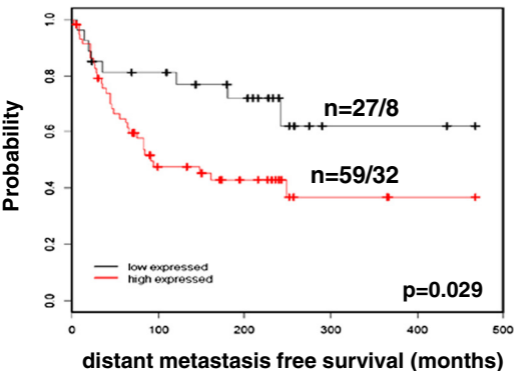**B** miR-21 expression in IDC breast cancer with radiation therapy (33 cases)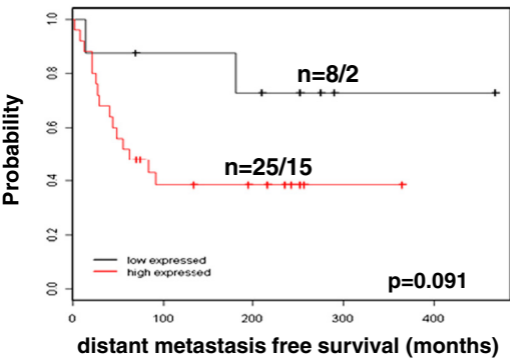

Supplement: MOESM9 [file 9634002]
